# Supplementary material for: Effects of Active-Center Reduction of Plant-Type Ferredoxin on Its Structure and Dynamics: Computational Analysis Using Molecular Dynamics Simulations
Source: MDPI journal article supplement (doi:10.3390/ijms232415913), 2022-12-14
Supplement: s1 [file s1]

## Supplementary Materials

# Effects of Active-Center Reduction of Plant-Type Ferredoxin on Its Structure and Dynamics: Computational Analysis Using Molecular Dynamics Simulations

Tomoki Nakayoshi <sup>1,\*</sup>, Yusuke Ohnishi <sup>2</sup>, Hideaki Tanaka <sup>2</sup>, Genji Kurisu <sup>2</sup>, Hiroko X. Kondo <sup>1,3</sup>, and Yu Takano <sup>1,\*</sup>

<sup>1</sup> Graduate School of Information Sciences, Hiroshima City University, 3-4-1 Ozukahigashi, Asaminami-ku, Hiroshima, Hiroshima 731-3194, Japan

<sup>2</sup> Institute for Protein Research, Osaka University, 3-2 Yamadaoka, Suita, Osaka 565-0871, Japan

<sup>3</sup> Faculty of Engineering, Kitami Institute of Technology, 165 Koen-cho, Kitami, Hokkaido 090-8507, Japan

\* Correspondence: nakayoshi@hiroshima-cu.ac.jp (T.N.); ytakano@hiroshima-cu.ac.jp (Y.T.); Tel.: +81-82-830-1736 (T.N.); +81-82-830-1852 (Y.T.)

**Table S1.** Comparison of the calculated structures of oxidized forms obtained by MD simulations and the crystal structures. S $\gamma$ 1, S $\gamma$ 2, S $\gamma$ 3, and S $\gamma$ 4 are represented the side-chain sulfhydryl sulfurs of Cys37, Cys42, Cys45, and Cys75 in CrFd1 (Cys41, Cys46, Cys49, Cys79 in *Anabaena* PCC7119 Fd), respectively.

| Bond or angle                 | Calculated structure | 6KUM    | 1QT9    |
|-------------------------------|----------------------|---------|---------|
| Fe1–S1                        | 2.174 $\pm$ 0.048    | 2.215   | 2.278   |
| Fe1–S2                        | 2.135 $\pm$ 0.048    | 2.172   | 2.236   |
| Fe2–S1                        | 2.198 $\pm$ 0.050    | 2.187   | 2.226   |
| Fe2–S2                        | 2.152 $\pm$ 0.050    | 2.145   | 2.192   |
| S $\gamma$ 1–Fe1              | 2.269 $\pm$ 0.059    | 2.345   | 2.338   |
| S $\gamma$ 2–Fe1              | 2.275 $\pm$ 0.061    | 2.298   | 2.278   |
| S $\gamma$ 3–Fe2              | 2.251 $\pm$ 0.058    | 2.329   | 2.288   |
| S $\gamma$ 4–Fe2              | 2.205 $\pm$ 0.058    | 2.303   | 2.290   |
| Fe1–S1–Fe2                    | 74.396 $\pm$ 1.912   | 75.542  | 75.063  |
| S1–Fe2–S2                     | 103.407 $\pm$ 2.169  | 104.289 | 105.604 |
| Fe2–S2–Fe1                    | 76.139 $\pm$ 1.990   | 77.307  | 76.574  |
| S2–Fe1–S1                     | 104.810 $\pm$ 2.178  | 102.435 | 102.452 |
| S $\gamma$ 1–Fe1–S1           | 116.185 $\pm$ 4.143  | 120.104 | 119.858 |
| S $\gamma$ 1–Fe1–S2           | 103.680 $\pm$ 3.929  | 102.484 | 102.156 |
| S $\gamma$ 2–Fe1–S1           | 104.033 $\pm$ 3.905  | 109.458 | 108.074 |
| S $\gamma$ 2–Fe1–S2           | 117.345 $\pm$ 4.536  | 117.413 | 119.133 |
| S $\gamma$ 1–Fe1–S $\gamma$ 2 | 110.720 $\pm$ 4.222  | 105.471 | 105.917 |
| S $\gamma$ 3–Fe2–S1           | 114.982 $\pm$ 3.649  | 112.029 | 112.396 |
| S $\gamma$ 3–Fe2–S2           | 109.435 $\pm$ 4.200  | 111.497 | 111.213 |
| S $\gamma$ 4–Fe2–S1           | 112.659 $\pm$ 3.960  | 118.009 | 115.997 |
| S $\gamma$ 4–Fe2–S2           | 109.448 $\pm$ 3.778  | 104.276 | 104.842 |
| S $\gamma$ 3–Fe2–S $\gamma$ 4 | 106.438 $\pm$ 4.447  | 106.494 | 106.574 |

**Table S2.** Comparison of the calculated structures of reduced forms obtained by MD simulations and the crystal structures. S $\gamma$ 1, S $\gamma$ 2, S $\gamma$ 3, and S $\gamma$ 4 are represented the side-chain sulfhydryl sulfurs of Cys37, Cys42, Cys45, and Cys75 in CrFd1 (Cys41, Cys46, Cys49, Cys79 in *Anabaena* PCC7119 Fd), respectively.

| Bond or angle                 | Calculated structure | 6KV0    | 1CZP    |
|-------------------------------|----------------------|---------|---------|
| Fe1–S1                        | 2.265 $\pm$ 0.062    | 2.239   | 2.285   |
| Fe1–S2                        | 2.212 $\pm$ 0.063    | 2.183   | 2.218   |
| Fe2–S1                        | 2.164 $\pm$ 0.049    | 2.164   | 2.198   |
| Fe2–S2                        | 2.155 $\pm$ 0.048    | 2.187   | 2.233   |
| S $\gamma$ 1–Fe1              | 2.204 $\pm$ 0.085    | 2.393   | 2.361   |
| S $\gamma$ 2–Fe1              | 2.281 $\pm$ 0.087    | 2.337   | 2.3     |
| S $\gamma$ 3–Fe2              | 2.301 $\pm$ 0.070    | 2.312   | 2.313   |
| S $\gamma$ 4–Fe2              | 2.220 $\pm$ 0.070    | 2.338   | 2.297   |
| Fe1–S1–Fe2                    | 73.903 $\pm$ 2.230   | 75.955  | 75.174  |
| S1–Fe2–S2                     | 106.013 $\pm$ 2.547  | 104.373 | 105.505 |
| Fe2–S2–Fe1                    | 75.157 $\pm$ 2.295   | 77.437  | 76.624  |
| S2–Fe1–S1                     | 100.803 $\pm$ 2.325  | 101.770 | 102.154 |
| S $\gamma$ 1–Fe1–S1           | 116.814 $\pm$ 4.363  | 118.783 | 119.24  |
| S $\gamma$ 1–Fe1–S2           | 109.507 $\pm$ 4.636  | 103.254 | 103.195 |
| S $\gamma$ 2–Fe1–S1           | 107.325 $\pm$ 4.634  | 110.876 | 110.851 |
| S $\gamma$ 2–Fe1–S2           | 111.045 $\pm$ 4.356  | 116.955 | 118.842 |
| S $\gamma$ 1–Fe1–S $\gamma$ 2 | 110.402 $\pm$ 4.549  | 105.542 | 103.208 |
| S $\gamma$ 3–Fe2–S1           | 116.625 $\pm$ 3.839  | 112.659 | 114.314 |
| S $\gamma$ 3–Fe2–S2           | 107.502 $\pm$ 4.177  | 111.653 | 111.362 |
| S $\gamma$ 4–Fe2–S1           | 111.890 $\pm$ 3.953  | 118.650 | 114.901 |
| S $\gamma$ 4–Fe2–S2           | 113.772 $\pm$ 3.709  | 104.524 | 105.573 |
| S $\gamma$ 3–Fe2–S $\gamma$ 4 | 100.792 $\pm$ 4.469  | 104.781 | 104.954 |

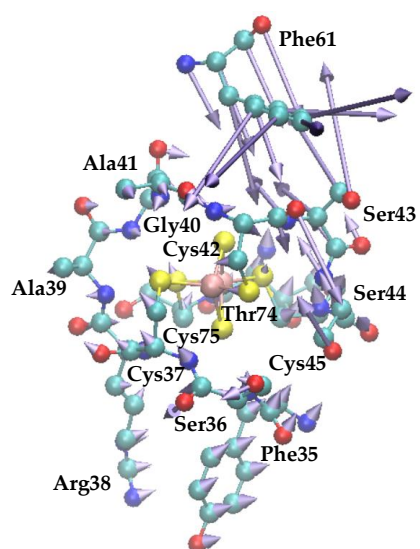

**Figure S1.** The dominant motion along PC1 up to 1.5 ns after the start of the production MD simulation.

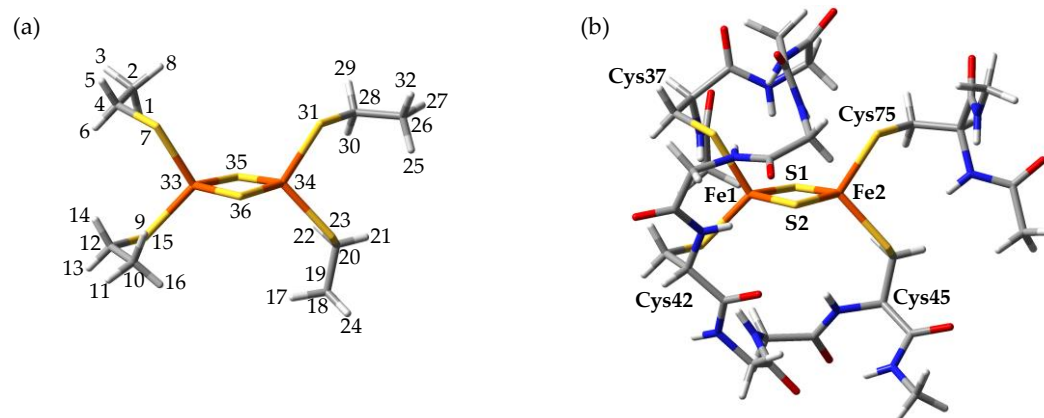

**Figure S2.** Geometry of Models 1 (a) and 2 (b) constructed based on the crystal structure by MCPB.py. The hydrogen, carbon, nitrogen, oxygen, sulfur, and iron atoms are displayed in white, gray, red, yellow, and orange, respectively, in tube models.

**Table S3.** Cartesian coordinates of the optimized geometry of Model 1 with oxidized state.

| Number | Atomic symbol | <i>x</i>  | <i>y</i>  | <i>z</i>  |
|--------|---------------|-----------|-----------|-----------|
| 1      | H             | −1.397372 | −3.144321 | 1.853587  |
| 2      | C             | −2.452648 | −3.414931 | 1.757874  |
| 3      | H             | −2.838263 | −3.687151 | 2.750481  |
| 4      | C             | −3.234505 | −2.251314 | 1.165126  |
| 5      | H             | −4.292635 | −2.525356 | 1.067061  |
| 6      | H             | −3.185048 | −1.385185 | 1.833102  |
| 7      | S             | −2.634861 | −1.752167 | −0.477720 |
| 8      | H             | −2.513620 | −4.293598 | 1.107064  |
| 9      | H             | −1.885271 | 2.796419  | −1.249317 |
| 10     | C             | −2.743176 | 3.131942  | −0.660111 |
| 11     | H             | −3.523878 | 3.489570  | −1.346178 |
| 12     | C             | −3.254227 | 1.989737  | 0.206021  |
| 13     | H             | −4.115576 | 2.326093  | 0.796974  |
| 14     | H             | −3.598676 | 1.163218  | −0.424280 |
| 15     | S             | −2.000072 | 1.354598  | 1.359985  |
| 16     | H             | −2.413575 | 3.971505  | −0.039012 |
| 17     | H             | 1.062987  | 3.253768  | −1.019125 |
| 18     | C             | 1.612115  | 3.706257  | −0.189257 |
| 19     | H             | 0.940606  | 4.401827  | 0.330499  |
| 20     | C             | 2.094956  | 2.615024  | 0.753217  |
| 21     | H             | 2.632465  | 3.056992  | 1.601034  |
| 22     | H             | 1.233752  | 2.079465  | 1.163798  |
| 23     | S             | 3.209094  | 1.424553  | −0.056215 |
| 24     | H             | 2.456450  | 4.271034  | −0.601259 |
| 25     | H             | 4.113062  | −1.433096 | 1.093438  |
| 26     | C             | 4.529965  | −2.332798 | 0.631719  |
| 27     | H             | 4.821897  | −3.032298 | 1.427495  |
| 28     | C             | 3.507642  | −2.965056 | −0.300660 |
| 29     | H             | 3.923646  | −3.876125 | −0.748823 |
| 30     | H             | 2.618263  | −3.252994 | 0.266996  |
| 31     | S             | 2.995265  | −1.879244 | −1.666581 |
| 32     | H             | 5.427069  | −2.034523 | 0.079230  |
| 33     | Fe            | −0.947241 | −0.263925 | 0.069620  |
| 34     | Fe            | 1.740172  | −0.272463 | −0.598462 |
| 35     | S             | 0.751056  | −1.053851 | 1.237008  |
| 36     | S             | 0.011008  | 0.483141  | −1.770886 |

**Table S4.** Cartesian coordinates of the optimized geometry of Model 1 with reduced state.

| Number | Atomic symbol | <i>x</i>  | <i>y</i>  | <i>z</i>  |
|--------|---------------|-----------|-----------|-----------|
| 1      | H             | 1.901285  | −2.713471 | −1.828501 |
| 2      | C             | 2.797285  | −3.247705 | −1.497681 |
| 3      | H             | 3.419824  | −3.476670 | −2.378011 |
| 4      | C             | 3.549786  | −2.396806 | −0.482187 |
| 5      | H             | 4.455148  | −2.930545 | −0.155525 |
| 6      | H             | 3.867020  | −1.468373 | −0.970710 |
| 7      | S             | 2.543498  | −1.978531 | 0.973197  |
| 8      | H             | 2.468103  | −4.189740 | −1.044342 |
| 9      | H             | 2.823321  | 2.151715  | 1.644170  |
| 10     | C             | 3.731305  | 2.402677  | 1.087222  |
| 11     | H             | 4.569251  | 2.501077  | 1.796704  |
| 12     | C             | 4.000561  | 1.326206  | 0.042559  |
| 13     | H             | 4.914072  | 1.579439  | −0.516563 |
| 14     | H             | 4.178189  | 0.373094  | 0.554667  |
| 15     | S             | 2.619233  | 1.112496  | −1.120616 |
| 16     | H             | 3.562238  | 3.373051  | 0.606400  |
| 17     | H             | −0.633650 | 3.518656  | 0.340257  |
| 18     | C             | −1.066870 | 3.963782  | −0.559917 |
| 19     | H             | −0.263380 | 4.462814  | −1.119934 |
| 20     | C             | −1.714254 | 2.865751  | −1.391353 |
| 21     | H             | −2.129873 | 3.289804  | −2.316458 |
| 22     | H             | −0.950931 | 2.137518  | −1.683851 |
| 23     | S             | −3.041247 | 1.987372  | −0.507816 |
| 24     | H             | −1.809556 | 4.713537  | −0.257353 |
| 25     | H             | −4.252624 | −0.802924 | −1.304239 |
| 26     | C             | −4.823006 | −1.604436 | −0.825376 |
| 27     | H             | −5.100080 | −2.347634 | −1.589666 |
| 28     | C             | −3.985653 | −2.233361 | 0.279559  |
| 29     | H             | −4.548264 | −3.050698 | 0.753771  |
| 30     | H             | −3.077314 | −2.658788 | −0.157623 |
| 31     | S             | −3.491174 | −1.055226 | 1.573524  |
| 32     | H             | −5.738651 | −1.161673 | −0.415831 |
| 33     | Fe            | 1.046883  | −0.251411 | 0.144744  |
| 34     | Fe            | −1.780538 | 0.193044  | 0.468229  |
| 35     | S             | −0.795422 | −0.979108 | −1.119803 |
| 36     | S             | −0.166561 | 0.927219  | 1.771642  |

**Table S5.** Input files for calculating oxidized C7Fd1.

Atomic coordinates, atom types, and atomic charges for Fe1.

|   |    |         |         |         |    |   |     |          |
|---|----|---------|---------|---------|----|---|-----|----------|
| 1 | FE | -0.4320 | -6.6080 | 34.1950 | M1 | 1 | FE1 | 0.955780 |
|---|----|---------|---------|---------|----|---|-----|----------|

Atomic coordinates, atom types, and atomic charges for Fe2

|   |    |        |         |         |    |   |     |          |
|---|----|--------|---------|---------|----|---|-----|----------|
| 1 | FE | 0.3480 | -4.6240 | 35.9400 | M2 | 1 | FE2 | 0.943202 |
|---|----|--------|---------|---------|----|---|-----|----------|

Atomic coordinates, atom types, and atomic charges for S1

|   |    |         |         |         |    |   |     |           |
|---|----|---------|---------|---------|----|---|-----|-----------|
| 1 | S1 | -0.0530 | -4.4140 | 33.7700 | Y3 | 1 | S11 | -0.768751 |
|---|----|---------|---------|---------|----|---|-----|-----------|

Atomic coordinates, atom types, and atomic charges for S2

|   |    |        |         |         |    |   |     |           |
|---|----|--------|---------|---------|----|---|-----|-----------|
| 1 | S2 | 0.1360 | -6.7640 | 36.3320 | Y4 | 1 | S21 | -0.768751 |
|---|----|--------|---------|---------|----|---|-----|-----------|

Atomic coordinates, atom types, and atomic charges for Cys37

|    |     |         |         |         |    |   |     |           |
|----|-----|---------|---------|---------|----|---|-----|-----------|
| 1  | N   | -2.4210 | -5.4800 | 31.3650 | N  | 1 | CM1 | -0.415700 |
| 2  | H   | -1.7280 | -5.9320 | 31.6000 | H  | 1 | CM1 | 0.271900  |
| 3  | CA  | -3.6630 | -5.9160 | 32.0090 | CX | 1 | CM1 | -0.335699 |
| 4  | HA  | -4.3370 | -6.0010 | 31.3170 | H1 | 1 | CM1 | 0.184747  |
| 5  | CB  | -3.4910 | -7.2800 | 32.6410 | CT | 1 | CM1 | -0.133559 |
| 6  | HB2 | -4.3720 | -7.6680 | 32.7610 | H1 | 1 | CM1 | 0.158749  |
| 7  | HB3 | -3.0160 | -7.8440 | 32.0110 | H1 | 1 | CM1 | 0.158749  |
| 8  | SG  | -2.6200 | -7.3640 | 34.2360 | Y1 | 1 | CM1 | -0.532185 |
| 9  | C   | -4.2140 | -4.8740 | 32.9880 | C  | 1 | CM1 | 0.597300  |
| 10 | O   | -5.4230 | -4.7640 | 33.1360 | O  | 1 | CM1 | -0.567900 |

Atomic coordinates, atom types, and atomic charges for Cys42

|    |     |         |          |         |    |   |     |           |
|----|-----|---------|----------|---------|----|---|-----|-----------|
| 1  | N   | -0.0600 | -9.9780  | 35.4400 | N  | 1 | CM2 | -0.415700 |
| 2  | H   | 0.0290  | -9.2800  | 35.9350 | H  | 1 | CM2 | 0.271900  |
| 3  | CA  | 0.9670  | -10.1510 | 34.4430 | CX | 1 | CM2 | 0.005412  |
| 4  | HA  | 1.1730  | -11.0880 | 34.3020 | H1 | 1 | CM2 | 0.035745  |
| 5  | CB  | 0.4580  | -9.6580  | 33.0580 | CT | 1 | CM2 | -0.032968 |
| 6  | HB2 | 0.9070  | -10.1730 | 32.3700 | H1 | 1 | CM2 | 0.060571  |
| 7  | HB3 | -0.4880 | -9.8620  | 32.9930 | H1 | 1 | CM2 | 0.060571  |
| 8  | SG  | 0.6830  | -7.9030  | 32.6880 | Y2 | 1 | CM2 | -0.625555 |
| 9  | C   | 2.2780  | -9.5270  | 34.9430 | C  | 1 | CM2 | 0.597300  |
| 10 | O   | 2.3440  | -9.0920  | 36.0880 | O  | 1 | CM2 | -0.567900 |

Atomic coordinates, atom types, and atomic charges for Cys45

|    |     |        |         |         |    |   |     |           |
|----|-----|--------|---------|---------|----|---|-----|-----------|
| 1  | N   | 4.0210 | -4.3720 | 33.8900 | N  | 1 | CM3 | -0.415700 |
| 2  | H   | 3.4340 | -4.8920 | 34.2440 | H  | 1 | CM3 | 0.271900  |
| 3  | CA  | 4.2600 | -3.1460 | 34.6480 | CX | 1 | CM3 | -0.470770 |
| 4  | HA  | 4.6070 | -2.4690 | 34.0460 | H1 | 1 | CM3 | 0.268333  |
| 5  | CB  | 2.9230 | -2.6920 | 35.2580 | CT | 1 | CM3 | 0.037093  |
| 6  | HB2 | 3.0140 | -1.8050 | 35.6400 | H1 | 1 | CM3 | 0.101128  |
| 7  | HB3 | 2.2430 | -2.6350 | 34.5680 | H1 | 1 | CM3 | 0.101128  |
| 8  | SG  | 2.4220 | -3.8600 | 36.5240 | Y5 | 1 | CM3 | -0.472064 |
| 9  | C   | 5.3320 | -3.3280 | 35.7450 | C  | 1 | CM3 | 0.597300  |
| 10 | O   | 5.4710 | -2.5060 | 36.6600 | O  | 1 | CM3 | -0.567900 |

Atomic coordinates, atom types, and atomic charges for Cys75

|    |     |         |         |         |    |   |     |           |
|----|-----|---------|---------|---------|----|---|-----|-----------|
| 1  | N   | 1.0010  | -1.4120 | 38.5340 | N  | 1 | CM4 | -0.415700 |
| 2  | H   | 1.3030  | -2.1050 | 38.1240 | H  | 1 | CM4 | 0.271900  |
| 3  | CA  | -0.4310 | -1.1000 | 38.2980 | CX | 1 | CM4 | -0.408052 |
| 4  | HA  | -0.4680 | -0.1480 | 38.1170 | H1 | 1 | CM4 | 0.170050  |
| 5  | CB  | -0.9590 | -1.8790 | 37.0750 | CT | 1 | CM4 | 0.601561  |
| 6  | HB2 | -1.8230 | -1.5240 | 36.8140 | H1 | 1 | CM4 | -0.093969 |
| 7  | HB3 | -0.3590 | -1.7470 | 36.3240 | H1 | 1 | CM4 | -0.093969 |
| 8  | SG  | -1.1140 | -3.6550 | 37.4210 | Y6 | 1 | CM4 | -0.648927 |
| 9  | C   | -1.3290 | -1.3110 | 39.5110 | C  | 1 | CM4 | 0.597300  |
| 10 | O   | -2.4810 | -0.7950 | 39.4930 | O  | 1 | CM4 | -0.567900 |

## AMBER parameter file

### MASS

|    |       |       |                               |
|----|-------|-------|-------------------------------|
| M1 | 55.85 |       | Fe ion                        |
| M2 | 55.85 |       | Fe ion                        |
| Y1 | 32.06 | 2.900 | S in cystine                  |
| Y2 | 32.06 | 2.900 | S in cystine                  |
| Y5 | 32.06 | 2.900 | S in cystine                  |
| Y6 | 32.06 | 2.900 | S in cystine                  |
| Y3 | 32.06 | 2.900 | Sp3 S connected with hydrogen |
| Y4 | 32.06 | 2.900 | Sp3 S connected with hydrogen |

### BOND

|       |       |        |                                                 |
|-------|-------|--------|-------------------------------------------------|
| M1-Y3 | 109.4 | 2.2070 | Created by Seminario method using MCPB.py       |
| M1-Y4 | 110.4 | 2.2054 | Created by Seminario method using MCPB.py       |
| M2-Y3 | 99.7  | 2.2266 | Created by Seminario method using MCPB.py       |
| M2-Y4 | 102.1 | 2.2216 | Created by Seminario method using MCPB.py       |
| Y1-M1 | 82.9  | 2.3157 | Created by Seminario method using MCPB.py       |
| Y2-M1 | 80.3  | 2.3223 | Created by Seminario method using MCPB.py       |
| Y5-M2 | 85.4  | 2.3090 | Created by Seminario method using MCPB.py       |
| Y6-M2 | 87.2  | 2.3017 | Created by Seminario method using MCPB.py       |
| CT-Y1 | 237.0 | 1.810  | changed from 222.0 based on methanethiol nmodes |
| CT-Y2 | 237.0 | 1.810  | changed from 222.0 based on methanethiol nmodes |
| CT-Y5 | 237.0 | 1.810  | changed from 222.0 based on methanethiol nmodes |
| CT-Y6 | 237.0 | 1.810  | changed from 222.0 based on methanethiol nmodes |

### ANGL

|          |       |        |                                           |
|----------|-------|--------|-------------------------------------------|
| CT-Y1-M1 | 72.69 | 101.72 | Created by Seminario method using MCPB.py |
| CT-Y2-M1 | 71.25 | 101.74 | Created by Seminario method using MCPB.py |
| CT-Y5-M2 | 64.76 | 101.29 | Created by Seminario method using MCPB.py |
| CT-Y6-M2 | 82.99 | 102.82 | Created by Seminario method using MCPB.py |
| M1-Y3-M2 | 78.53 | 77.30  | Created by Seminario method using MCPB.py |
| M1-Y4-M2 | 76.06 | 77.44  | Created by Seminario method using MCPB.py |
| Y1-M1-Y2 | 30.15 | 104.41 | Created by Seminario method using MCPB.py |
| Y1-M1-Y3 | 46.82 | 117.12 | Created by Seminario method using MCPB.py |
| Y1-M1-Y4 | 52.03 | 109.70 | Created by Seminario method using MCPB.py |
| Y2-M1-Y3 | 50.76 | 107.72 | Created by Seminario method using MCPB.py |
| Y2-M1-Y4 | 44.75 | 115.13 | Created by Seminario method using MCPB.py |
| Y4-M1-Y3 | 97.42 | 103.20 | Created by Seminario method using MCPB.py |
| Y4-M2-Y3 | 99.30 | 102.04 | Created by Seminario method using MCPB.py |
| Y5-M2-Y3 | 40.09 | 110.30 | Created by Seminario method using MCPB.py |
| Y5-M2-Y4 | 43.36 | 111.66 | Created by Seminario method using MCPB.py |
| Y5-M2-Y6 | 29.31 | 105.97 | Created by Seminario method using MCPB.py |
| Y6-M2-Y3 | 53.17 | 112.32 | Created by Seminario method using MCPB.py |
| Y6-M2-Y4 | 55.92 | 114.64 | Created by Seminario method using MCPB.py |
| CX-CT-Y1 | 50.0  | 108.60 | AA cys (was CT-CT-SH)                     |
| CX-CT-Y2 | 50.0  | 108.60 | AA cys (was CT-CT-SH)                     |
| CX-CT-Y5 | 50.0  | 108.60 | AA cys (was CT-CT-SH)                     |
| CX-CT-Y6 | 50.0  | 108.60 | AA cys (was CT-CT-SH)                     |
| Y1-CT-H1 | 50.0  | 109.50 | AA cyx changed based on NMA nmodes        |
| Y2-CT-H1 | 50.0  | 109.50 | AA cyx changed based on NMA nmodes        |
| Y5-CT-H1 | 50.0  | 109.50 | AA cyx changed based on NMA nmodes        |
| Y6-CT-H1 | 50.0  | 109.50 | AA cyx changed based on NMA nmodes        |

### DIHE

|             |   |      |      |     |                          |
|-------------|---|------|------|-----|--------------------------|
| CT-Y1-M1-Y2 | 3 | 0.00 | 0.00 | 3.0 | Treat as zero by MCPB.py |
| CT-Y1-M1-Y3 | 3 | 0.00 | 0.00 | 3.0 | Treat as zero by MCPB.py |
| CT-Y1-M1-Y4 | 3 | 0.00 | 0.00 | 3.0 | Treat as zero by MCPB.py |
| CT-Y2-M1-Y3 | 3 | 0.00 | 0.00 | 3.0 | Treat as zero by MCPB.py |
| CT-Y2-M1-Y4 | 3 | 0.00 | 0.00 | 3.0 | Treat as zero by MCPB.py |
| CT-Y5-M2-Y3 | 3 | 0.00 | 0.00 | 3.0 | Treat as zero by MCPB.py |
| CT-Y5-M2-Y4 | 3 | 0.00 | 0.00 | 3.0 | Treat as zero by MCPB.py |
| CT-Y5-M2-Y6 | 3 | 0.00 | 0.00 | 3.0 | Treat as zero by MCPB.py |
| CT-Y6-M2-Y3 | 3 | 0.00 | 0.00 | 3.0 | Treat as zero by MCPB.py |
| CT-Y6-M2-Y4 | 3 | 0.00 | 0.00 | 3.0 | Treat as zero by MCPB.py |
| M1-Y1-CT-H1 | 3 | 0.00 | 0.00 | 3.0 | Treat as zero by MCPB.py |
| M1-Y2-CT-H1 | 3 | 0.00 | 0.00 | 3.0 | Treat as zero by MCPB.py |
| M1-Y3-M2-Y4 | 3 | 0.00 | 0.00 | 3.0 | Treat as zero by MCPB.py |
| M1-Y4-M2-Y3 | 3 | 0.00 | 0.00 | 3.0 | Treat as zero by MCPB.py |
| M2-Y4-M1-Y3 | 3 | 0.00 | 0.00 | 3.0 | Treat as zero by MCPB.py |
| M2-Y5-CT-H1 | 3 | 0.00 | 0.00 | 3.0 | Treat as zero by MCPB.py |
| M2-Y6-CT-H1 | 3 | 0.00 | 0.00 | 3.0 | Treat as zero by MCPB.py |
| CX-CT-Y1-M1 | 3 | 0.00 | 0.00 | 3.0 | Treat as zero by MCPB.py |
| CX-CT-Y2-M1 | 3 | 0.00 | 0.00 | 3.0 | Treat as zero by MCPB.py |
| CX-CT-Y5-M2 | 3 | 0.00 | 0.00 | 3.0 | Treat as zero by MCPB.py |
| CX-CT-Y6-M2 | 3 | 0.00 | 0.00 | 3.0 | Treat as zero by MCPB.py |
| Y1-M1-Y2-CT | 3 | 0.00 | 0.00 | 3.0 | Treat as zero by MCPB.py |
| Y1-M1-Y3-M2 | 3 | 0.00 | 0.00 | 3.0 | Treat as zero by MCPB.py |



|             |   |      |      |     |                          |
|-------------|---|------|------|-----|--------------------------|
| Y1-M1-Y4-M2 | 3 | 0.00 | 0.00 | 3.0 | Treat as zero by MCPB.py |
| Y2-M1-Y3-M2 | 3 | 0.00 | 0.00 | 3.0 | Treat as zero by MCPB.py |
| Y2-M1-Y4-M2 | 3 | 0.00 | 0.00 | 3.0 | Treat as zero by MCPB.py |
| Y4-M1-Y3-M2 | 3 | 0.00 | 0.00 | 3.0 | Treat as zero by MCPB.py |
| Y5-M2-Y3-M1 | 3 | 0.00 | 0.00 | 3.0 | Treat as zero by MCPB.py |
| Y5-M2-Y4-M1 | 3 | 0.00 | 0.00 | 3.0 | Treat as zero by MCPB.py |
| Y5-M2-Y6-CT | 3 | 0.00 | 0.00 | 3.0 | Treat as zero by MCPB.py |
| Y6-M2-Y3-M1 | 3 | 0.00 | 0.00 | 3.0 | Treat as zero by MCPB.py |
| Y6-M2-Y4-M1 | 3 | 0.00 | 0.00 | 3.0 | Treat as zero by MCPB.py |

IMPR

|      |        |              |                                                                    |  |  |
|------|--------|--------------|--------------------------------------------------------------------|--|--|
| NONB |        |              |                                                                    |  |  |
| M1   | 1.4000 | 0.0157074900 | IOD set for Fe3+ ion OPC water from Li et al. JCTC, 2021, 17, 2342 |  |  |
| M2   | 1.4000 | 0.0157074900 | IOD set for Fe3+ ion OPC water from Li et al. JCTC, 2021, 17, 2342 |  |  |
| Y1   | 1.9825 | 0.2824       | gaff2                                                              |  |  |
| Y2   | 1.9825 | 0.2824       | gaff2                                                              |  |  |
| Y5   | 1.9825 | 0.2824       | gaff2                                                              |  |  |
| Y6   | 1.9825 | 0.2824       | gaff2                                                              |  |  |
| Y3   | 2.0000 | 0.2500       | W. Cornell CH3SH and CH3SCH3 FEP's                                 |  |  |
| Y4   | 2.0000 | 0.2500       | W. Cornell CH3SH and CH3SCH3 FEP's                                 |  |  |

**Table S6.** Input files for calculating reduced CrFd1.

Atomic coordinates, atom types, and atomic charges for Fe1.

|   |    |         |         |         |    |   |     |          |
|---|----|---------|---------|---------|----|---|-----|----------|
| 1 | FE | -0.4320 | -6.6080 | 34.1950 | M1 | 1 | FE1 | 1.289628 |
|---|----|---------|---------|---------|----|---|-----|----------|

Atomic coordinates, atom types, and atomic charges for Fe2

|   |    |        |         |         |    |   |     |          |
|---|----|--------|---------|---------|----|---|-----|----------|
| 1 | FE | 0.3480 | -4.6240 | 35.9400 | M2 | 1 | FE2 | 0.878303 |
|---|----|--------|---------|---------|----|---|-----|----------|

Atomic coordinates, atom types, and atomic charges for S1

|   |    |         |         |         |    |   |     |           |
|---|----|---------|---------|---------|----|---|-----|-----------|
| 1 | S1 | -0.0530 | -4.4140 | 33.7700 | Y3 | 1 | S11 | -1.020379 |
|---|----|---------|---------|---------|----|---|-----|-----------|

Atomic coordinates, atom types, and atomic charges for S2

|   |    |        |         |         |    |   |     |           |
|---|----|--------|---------|---------|----|---|-----|-----------|
| 1 | S2 | 0.1360 | -6.7640 | 36.3320 | Y4 | 1 | S21 | -1.020379 |
|---|----|--------|---------|---------|----|---|-----|-----------|

Atomic coordinates, atom types, and atomic charges for Cys37

|    |     |         |         |         |    |   |     |           |
|----|-----|---------|---------|---------|----|---|-----|-----------|
| 1  | N   | -2.4210 | -5.4800 | 31.3650 | N  | 1 | CM1 | -0.415700 |
| 2  | H   | -1.7280 | -5.9320 | 31.6000 | H  | 1 | CM1 | 0.271900  |
| 3  | CA  | -3.6630 | -5.9160 | 32.0090 | CX | 1 | CM1 | -0.583485 |
| 4  | HA  | -4.3370 | -6.0010 | 31.3170 | H1 | 1 | CM1 | 0.224384  |
| 5  | CB  | -3.4910 | -7.2800 | 32.6410 | CT | 1 | CM1 | 0.068684  |
| 6  | HB2 | -4.3720 | -7.6680 | 32.7610 | H1 | 1 | CM1 | 0.116657  |
| 7  | HB3 | -3.0160 | -7.8440 | 32.0110 | H1 | 1 | CM1 | 0.116657  |
| 8  | SG  | -2.6200 | -7.3640 | 34.2360 | Y1 | 1 | CM1 | -0.772571 |
| 9  | C   | -4.2140 | -4.8740 | 32.9880 | C  | 1 | CM1 | 0.597300  |
| 10 | O   | -5.4230 | -4.7640 | 33.1360 | O  | 1 | CM1 | -0.567900 |

Atomic coordinates, atom types, and atomic charges for Cys42

|    |     |         |          |         |    |   |     |           |
|----|-----|---------|----------|---------|----|---|-----|-----------|
| 1  | N   | -0.0600 | -9.9780  | 35.4400 | N  | 1 | CM2 | -0.415700 |
| 2  | H   | 0.0290  | -9.2800  | 35.9350 | H  | 1 | CM2 | 0.271900  |
| 3  | CA  | 0.9670  | -10.1510 | 34.4430 | CX | 1 | CM2 | -0.077885 |
| 4  | HA  | 1.1730  | -11.0880 | 34.3020 | H1 | 1 | CM2 | 0.033021  |
| 5  | CB  | 0.4580  | -9.6580  | 33.0580 | CT | 1 | CM2 | 0.036640  |
| 6  | HB2 | 0.9070  | -10.1730 | 32.3700 | H1 | 1 | CM2 | 0.014812  |
| 7  | HB3 | -0.4880 | -9.8620  | 32.9930 | H1 | 1 | CM2 | 0.014812  |
| 8  | SG  | 0.6830  | -7.9030  | 32.6880 | Y2 | 1 | CM2 | -0.828237 |
| 9  | C   | 2.2780  | -9.5270  | 34.9430 | C  | 1 | CM2 | 0.597300  |
| 10 | O   | 2.3440  | -9.0920  | 36.0880 | O  | 1 | CM2 | -0.567900 |

Atomic coordinates, atom types, and atomic charges for Cys45

|    |     |        |         |         |    |   |     |           |
|----|-----|--------|---------|---------|----|---|-----|-----------|
| 1  | N   | 4.0210 | -4.3720 | 33.8900 | N  | 1 | CM3 | -0.415700 |
| 2  | H   | 3.4340 | -4.8920 | 34.2440 | H  | 1 | CM3 | 0.271900  |
| 3  | CA  | 4.2600 | -3.1460 | 34.6480 | CX | 1 | CM3 | -0.716522 |
| 4  | HA  | 4.6070 | -2.4690 | 34.0460 | H1 | 1 | CM3 | 0.333989  |
| 5  | CB  | 2.9230 | -2.6920 | 35.2580 | CT | 1 | CM3 | 0.120888  |
| 6  | HB2 | 3.0140 | -1.8050 | 35.6400 | H1 | 1 | CM3 | 0.106035  |
| 7  | HB3 | 2.2430 | -2.6350 | 34.5680 | H1 | 1 | CM3 | 0.106035  |
| 8  | SG  | 2.4220 | -3.8600 | 36.5240 | Y5 | 1 | CM3 | -0.430870 |
| 9  | C   | 5.3320 | -3.3280 | 35.7450 | C  | 1 | CM3 | 0.597300  |
| 10 | O   | 5.4710 | -2.5060 | 36.6600 | O  | 1 | CM3 | -0.567900 |

Atomic coordinates, atom types, and atomic charges for Cys75

|    |     |         |         |         |    |   |     |           |
|----|-----|---------|---------|---------|----|---|-----|-----------|
| 1  | N   | 1.0010  | -1.4120 | 38.5340 | N  | 1 | CM4 | -0.415700 |
| 2  | H   | 1.3030  | -2.1050 | 38.1240 | H  | 1 | CM4 | 0.271900  |
| 3  | CA  | -0.4310 | -1.1000 | 38.2980 | CX | 1 | CM4 | -0.658310 |
| 4  | HA  | -0.4680 | -0.1480 | 38.1170 | H1 | 1 | CM4 | 0.236996  |
| 5  | CB  | -0.9590 | -1.8790 | 37.0750 | CT | 1 | CM4 | 0.817922  |
| 6  | HB2 | -1.8230 | -1.5240 | 36.8140 | H1 | 1 | CM4 | -0.144886 |
| 7  | HB3 | -0.3590 | -1.7470 | 36.3240 | H1 | 1 | CM4 | -0.144886 |
| 8  | SG  | -1.1140 | -3.6550 | 37.4210 | Y6 | 1 | CM4 | -0.659453 |
| 9  | C   | -1.3290 | -1.3110 | 39.5110 | C  | 1 | CM4 | 0.597300  |
| 10 | O   | -2.4810 | -0.7950 | 39.4930 | O  | 1 | CM4 | -0.567900 |

## AMBER parameter file

### MASS

|    |       |       |                               |
|----|-------|-------|-------------------------------|
| M1 | 55.85 |       | Fe ion                        |
| M2 | 55.85 |       | Fe ion                        |
| Y1 | 32.06 | 2.900 | S in cystine                  |
| Y2 | 32.06 | 2.900 | S in cystine                  |
| Y5 | 32.06 | 2.900 | S in cystine                  |
| Y6 | 32.06 | 2.900 | S in cystine                  |
| Y3 | 32.06 | 2.900 | Sp3 S connected with hydrogen |
| Y4 | 32.06 | 2.900 | Sp3 S connected with hydrogen |

### BOND

|       |       |        |                                                 |
|-------|-------|--------|-------------------------------------------------|
| M1-Y3 | 59.6  | 2.3500 | Created by Seminario method using MCPB.py       |
| M1-Y4 | 60.0  | 2.3470 | Created by Seminario method using MCPB.py       |
| M2-Y3 | 111.5 | 2.2060 | Created by Seminario method using MCPB.py       |
| M2-Y4 | 115.2 | 2.2006 | Created by Seminario method using MCPB.py       |
| Y1-M1 | 40.5  | 2.4309 | Created by Seminario method using MCPB.py       |
| Y2-M1 | 38.3  | 2.4359 | Created by Seminario method using MCPB.py       |
| Y5-M2 | 56.3  | 2.4003 | Created by Seminario method using MCPB.py       |
| Y6-M2 | 58.8  | 2.3888 | Created by Seminario method using MCPB.py       |
| CT-Y1 | 237.0 | 1.810  | changed from 222.0 based on methanethiol nmodes |
| CT-Y2 | 237.0 | 1.810  | changed from 222.0 based on methanethiol nmodes |
| CT-Y5 | 237.0 | 1.810  | changed from 222.0 based on methanethiol nmodes |
| CT-Y6 | 237.0 | 1.810  | changed from 222.0 based on methanethiol nmodes |

### ANGL

|          |       |        |                                           |
|----------|-------|--------|-------------------------------------------|
| CT-Y1-M1 | 79.57 | 103.38 | Created by Seminario method using MCPB.py |
| CT-Y2-M1 | 80.82 | 102.94 | Created by Seminario method using MCPB.py |
| CT-Y5-M2 | 62.88 | 100.09 | Created by Seminario method using MCPB.py |
| CT-Y6-M2 | 88.28 | 101.77 | Created by Seminario method using MCPB.py |
| M1-Y3-M2 | 58.70 | 78.36  | Created by Seminario method using MCPB.py |
| M1-Y4-M2 | 57.18 | 78.53  | Created by Seminario method using MCPB.py |
| Y1-M1-Y2 | 29.96 | 100.22 | Created by Seminario method using MCPB.py |
| Y1-M1-Y3 | 47.66 | 116.49 | Created by Seminario method using MCPB.py |
| Y1-M1-Y4 | 41.47 | 116.03 | Created by Seminario method using MCPB.py |
| Y2-M1-Y3 | 39.40 | 113.57 | Created by Seminario method using MCPB.py |
| Y2-M1-Y4 | 47.91 | 114.37 | Created by Seminario method using MCPB.py |
| Y4-M1-Y3 | 94.89 | 97.08  | Created by Seminario method using MCPB.py |
| Y4-M2-Y3 | 77.46 | 106.03 | Created by Seminario method using MCPB.py |
| Y5-M2-Y3 | 34.18 | 109.82 | Created by Seminario method using MCPB.py |
| Y5-M2-Y4 | 40.81 | 112.13 | Created by Seminario method using MCPB.py |
| Y5-M2-Y6 | 32.25 | 101.69 | Created by Seminario method using MCPB.py |
| Y6-M2-Y3 | 56.75 | 112.04 | Created by Seminario method using MCPB.py |
| Y6-M2-Y4 | 56.04 | 115.18 | Created by Seminario method using MCPB.py |
| CX-CT-Y1 | 50.0  | 108.60 | AA cys (was CT-CT-SH)                     |
| CX-CT-Y2 | 50.0  | 108.60 | AA cys (was CT-CT-SH)                     |
| CX-CT-Y5 | 50.0  | 108.60 | AA cys (was CT-CT-SH)                     |
| CX-CT-Y6 | 50.0  | 108.60 | AA cys (was CT-CT-SH)                     |
| Y1-CT-H1 | 50.0  | 109.50 | AA cyx changed based on NMA nmodes        |
| Y2-CT-H1 | 50.0  | 109.50 | AA cyx changed based on NMA nmodes        |
| Y5-CT-H1 | 50.0  | 109.50 | AA cyx changed based on NMA nmodes        |
| Y6-CT-H1 | 50.0  | 109.50 | AA cyx changed based on NMA nmodes        |

### DIHE

|             |   |      |      |     |                          |
|-------------|---|------|------|-----|--------------------------|
| CT-Y1-M1-Y2 | 3 | 0.00 | 0.00 | 3.0 | Treat as zero by MCPB.py |
| CT-Y1-M1-Y3 | 3 | 0.00 | 0.00 | 3.0 | Treat as zero by MCPB.py |
| CT-Y1-M1-Y4 | 3 | 0.00 | 0.00 | 3.0 | Treat as zero by MCPB.py |
| CT-Y2-M1-Y3 | 3 | 0.00 | 0.00 | 3.0 | Treat as zero by MCPB.py |
| CT-Y2-M1-Y4 | 3 | 0.00 | 0.00 | 3.0 | Treat as zero by MCPB.py |
| CT-Y5-M2-Y3 | 3 | 0.00 | 0.00 | 3.0 | Treat as zero by MCPB.py |
| CT-Y5-M2-Y4 | 3 | 0.00 | 0.00 | 3.0 | Treat as zero by MCPB.py |
| CT-Y5-M2-Y6 | 3 | 0.00 | 0.00 | 3.0 | Treat as zero by MCPB.py |
| CT-Y6-M2-Y3 | 3 | 0.00 | 0.00 | 3.0 | Treat as zero by MCPB.py |
| CT-Y6-M2-Y4 | 3 | 0.00 | 0.00 | 3.0 | Treat as zero by MCPB.py |
| M1-Y1-CT-H1 | 3 | 0.00 | 0.00 | 3.0 | Treat as zero by MCPB.py |
| M1-Y2-CT-H1 | 3 | 0.00 | 0.00 | 3.0 | Treat as zero by MCPB.py |
| M1-Y3-M2-Y4 | 3 | 0.00 | 0.00 | 3.0 | Treat as zero by MCPB.py |
| M1-Y4-M2-Y3 | 3 | 0.00 | 0.00 | 3.0 | Treat as zero by MCPB.py |
| M2-Y4-M1-Y3 | 3 | 0.00 | 0.00 | 3.0 | Treat as zero by MCPB.py |
| M2-Y5-CT-H1 | 3 | 0.00 | 0.00 | 3.0 | Treat as zero by MCPB.py |
| M2-Y6-CT-H1 | 3 | 0.00 | 0.00 | 3.0 | Treat as zero by MCPB.py |
| CX-CT-Y1-M1 | 3 | 0.00 | 0.00 | 3.0 | Treat as zero by MCPB.py |
| CX-CT-Y2-M1 | 3 | 0.00 | 0.00 | 3.0 | Treat as zero by MCPB.py |
| CX-CT-Y5-M2 | 3 | 0.00 | 0.00 | 3.0 | Treat as zero by MCPB.py |
| CX-CT-Y6-M2 | 3 | 0.00 | 0.00 | 3.0 | Treat as zero by MCPB.py |
| Y1-M1-Y2-CT | 3 | 0.00 | 0.00 | 3.0 | Treat as zero by MCPB.py |
| Y1-M1-Y3-M2 | 3 | 0.00 | 0.00 | 3.0 | Treat as zero by MCPB.py |

|             |   |      |      |     |                          |
|-------------|---|------|------|-----|--------------------------|
| Y1-M1-Y4-M2 | 3 | 0.00 | 0.00 | 3.0 | Treat as zero by MCPB.py |
| Y2-M1-Y3-M2 | 3 | 0.00 | 0.00 | 3.0 | Treat as zero by MCPB.py |
| Y2-M1-Y4-M2 | 3 | 0.00 | 0.00 | 3.0 | Treat as zero by MCPB.py |
| Y4-M1-Y3-M2 | 3 | 0.00 | 0.00 | 3.0 | Treat as zero by MCPB.py |
| Y5-M2-Y3-M1 | 3 | 0.00 | 0.00 | 3.0 | Treat as zero by MCPB.py |
| Y5-M2-Y4-M1 | 3 | 0.00 | 0.00 | 3.0 | Treat as zero by MCPB.py |
| Y5-M2-Y6-CT | 3 | 0.00 | 0.00 | 3.0 | Treat as zero by MCPB.py |
| Y6-M2-Y3-M1 | 3 | 0.00 | 0.00 | 3.0 | Treat as zero by MCPB.py |
| Y6-M2-Y4-M1 | 3 | 0.00 | 0.00 | 3.0 | Treat as zero by MCPB.py |

IMPR

|      |        |              |                                                                    |  |  |
|------|--------|--------------|--------------------------------------------------------------------|--|--|
| NONB |        |              |                                                                    |  |  |
| M1   | 1.4000 | 0.0157074900 | IOD set for Fe3+ ion OPC water from Li et al. JCTC, 2021, 17, 2342 |  |  |
| M2   | 1.4000 | 0.0157074900 | IOD set for Fe3+ ion OPC water from Li et al. JCTC, 2021, 17, 2342 |  |  |
| Y1   | 1.9825 | 0.2824       | gaff2                                                              |  |  |
| Y2   | 1.9825 | 0.2824       | gaff2                                                              |  |  |
| Y5   | 1.9825 | 0.2824       | gaff2                                                              |  |  |
| Y6   | 1.9825 | 0.2824       | gaff2                                                              |  |  |
| Y3   | 2.0000 | 0.2500       | W. Cornell CH3SH and CH3SCH3 FEP's                                 |  |  |
| Y4   | 2.0000 | 0.2500       | W. Cornell CH3SH and CH3SCH3 FEP's                                 |  |  |
